# Supplementary material
Source: publisher figshare collection journal article supplement (https://karger.figshare.com/ndownloader/files/31548218)
Supplement: Supplementary file 1 [file 31548218]

| Search concepts | 1. Newborn | 2. Hypoxic Ischaemic Encephalopathy | 3. NIRS monitoring |
| --- | --- | --- | --- |
| PubMed | infant, newborn[MeSH Terms] OR infant[All Fields] OR "newborn"[All Fields] OR  newborn* OR neonat* OR infan* | “hypoxia ischaemia” OR hypoxic ischemia OR “hypoxic ischaemia” OR “hypoxic ischemic” OR “hypoxic ischaemic” OR HIE OR  asphyxia* OR “anoxia” [MeSH] OR  encephalopathy OR  “asphyxia neonatorum”[MeSH] OR “Hypoxia‐Ischemia, Brain”[MeSH] OR “neonatal encephalopathy” | “spectroscopy, near-infrared”[MeSH] OR “(cerebr* or regional* or tissue* or brain*) AND (oxymet* or oximet* or oxygen*)” OR “near infrared spectroscopy”  OR  "near infrared reflectance spectroscopy"  OR  nirs*  OR  "near ir spectroscopy"  OR  invos*  OR  equanox*  OR  foresight*  OR  "fore sight*"  OR  cerox*  OR  "cer ox*"  OR  "in spectra"  OR  inspectra*  OR  niro*  OR  "near ir spectroscop*"  OR  "near* infrared* spectroscop*"  OR  sto2  OR  rsco2  OR  rso2  OR  scto2  OR  "brain oxygenation"  OR  "cerebral oximeter"  OR  "cerebral oxim*"  OR  "cerebral oxygen |
| Scopus | | infan*  OR  newborn*  OR  neonat* | | --- | | hypoxia  OR  hypoxemia  OR  hypoxi*  OR  hypoxe*  OR  hypoxic  OR  anoxia  OR  anoxaemia  OR  asphyxia  OR  asphyxi*  OR  "hypoxic ischemic encephalopathy"  OR  "newborn hypoxia"  OR  ischaemia  OR  ischaemi*  OR  ischemi*  OR  "neonatal encephalopathy"  OR  "brain hypoxia"  OR  "perinatal asphyxi*" | near infrared spectroscopy  OR  "near infrared reflectance spectroscopy"  OR  nirs*  OR  "near ir spectroscopy"  OR  invos*  OR  equanox*  OR  foresight*  OR  "fore sight*"  OR  cerox*  OR  "cer ox*"  OR  "in spectra"  OR  inspectra*  OR  niro*  OR  "near ir spectroscop*"  OR  "near* infrared* spectroscop*"  OR  sto2  OR  rsco2  OR  rso2  OR  scto2  OR  "brain oxygenation"  OR  "cerebral oximeter"  OR  "cerebral oxim*"  OR  "cerebral oxygen saturation"  OR  "cerebral oxygenation"  OR  "cerebral oxygen*"  OR  "toe*"  OR  "regional oxymet*" |
| WOS | newborn* OR neonat* OR infan* | "hypoxi? isch$emi?" OR HIE OR asphyxia OR anoxia OR (hypoxi? OR ischaemi?) NEAR encephalop* OR (hypoxi? OR ischaemi?) NEAR brain OR encephalopath* OR “asphyxia neonatorum” OR “neonatal encephalopathy” | “spectroscopy, near-infrared”[MeSH] OR “(cerebr* or regional* or tissue* or brain*) AND (oxymet* or oximet* or oxygen*)” OR “near infrared spectroscopy”  OR  "near infrared reflectance spectroscopy"  OR  nirs*  OR  "near ir spectroscopy"  OR  invos*  OR  equanox*  OR  foresight*  OR  "fore sight*"  OR  cerox*  OR  "cer ox*"  OR  "in spectra"  OR  inspectra*  OR  niro*  OR  "near ir spectroscop*"  OR  "near* infrared* spectroscop*"  OR  sto2  OR  rsco2  OR  rso2  OR  scto2  OR  "brain oxygenation"  OR  "cerebral oximeter"  OR  "cerebral oxim*"  OR  "cerebral oxygen |
| Embase | infant'/exp OR infant OR infan* OR newborn* OR neonat* | hypoxia'/exp OR 'hypoxemia'/exp OR hypoxi* OR hypoxe* OR hypoxic OR 'anoxia'/exp OR 'anoxaemia'/exp OR 'asphyxia'/exp OR asphyxi* OR 'hypoxic ischemic encephalopathy'/exp OR 'newborn hypoxia'/exp OR 'ischemia'/exp OR 'ischaemia'/exp OR ischaemi* OR ischemi* OR 'neonatal encephalopathy'/exp OR 'brain hypoxia'/exp | near infrared spectroscopy'/exp OR 'near infrared reflectance spectroscopy'/exp OR 'nirs*' OR 'near ir spectroscopy' OR invos* OR equanox* OR foresight* OR 'fore sight*' OR cerox* OR 'cer ox*' OR 'in spectra' OR inspectra* OR niro* OR 'near ir spectroscop*' OR 'near* infrared* spectroscop*' OR 'sto2 or rsco2 or rso2 or scto2' OR 'brain oxygenation'/exp OR 'cerebral oximeter'/exp OR 'cerebral oxim*' OR 'cerebral oxygen saturation'/exp OR 'cerebral oxygenation'/exp OR 'cerebral oxygen*' OR 'toe*' OR 'regional oxymet*' |
| Cochrane library | newborn* OR neonat* OR infan* | “hypoxia ischaemia” OR “hypoxia ischemia” OR “hypoxia ischaemic” OR “hypoxia ischemic” OR “hypoxic ischemia” OR “hypoxic ischaemia” OR “hypoxic ischemic” OR “hypoxic ischaemic” OR HIE OR asphyxia* OR "hypoxia" [MeSH] OR “anoxia” [MeSH] OR encephalopath* OR “asphyxia neonatorum” [MeSH] OR Hypoxia‐Ischemia, Brain[MeSH] OR “neonatal encephalopathy” | “spectroscopy, near-infrared” [MeSH] OR “INVOS* or EQUANOX* or FORESIGHT* or FORE-SIGHT* or CerOX* or Cer-OX* or IN-Spectra or INSpectra* or Niro*” OR “NIRS*” OR “near IR spectroscop*” OR “near* infrared* spectroscop*” OR “(cerebr* or regional* or tissue* or brain*) AND (oxymet* or oximet* or oxygen*)” OR “StO2 or rscO2 or rSO2 or SctO2” OR *NIRS OR *TOE* |

Online Supplementary Table 1. Search terms used.
